# Supplementary material
Source: publisher site journal article supplement (https://www.dovepress.com/article/238706)

A

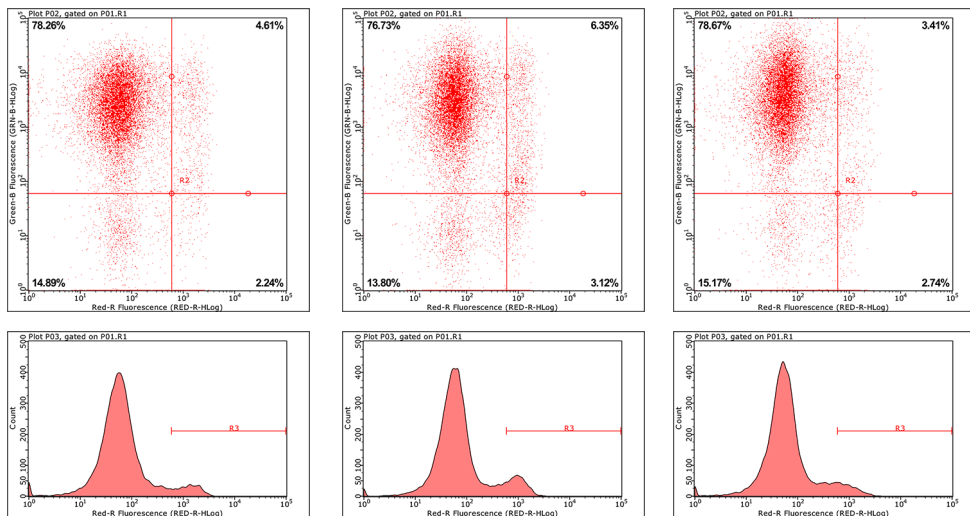

C

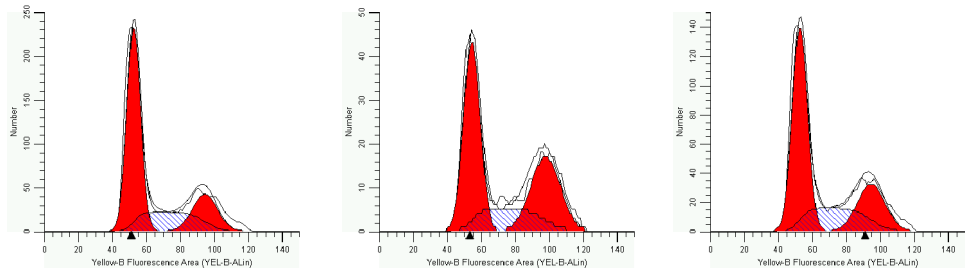

B

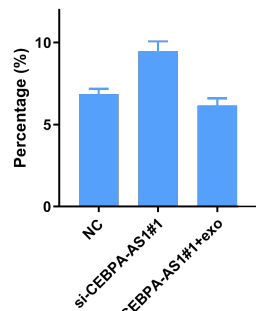

D

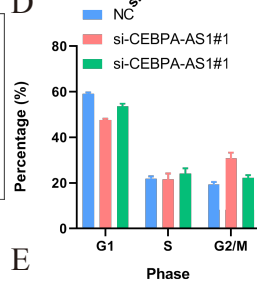

E

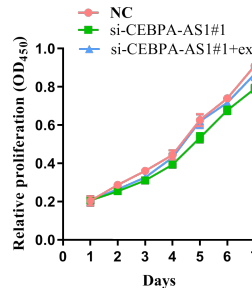

A

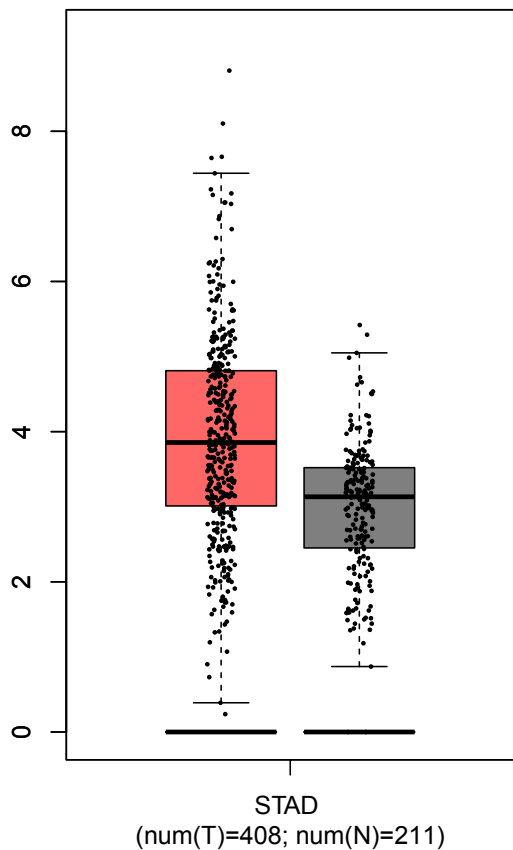

B

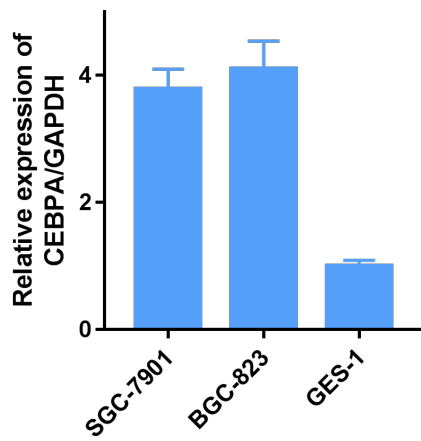

C

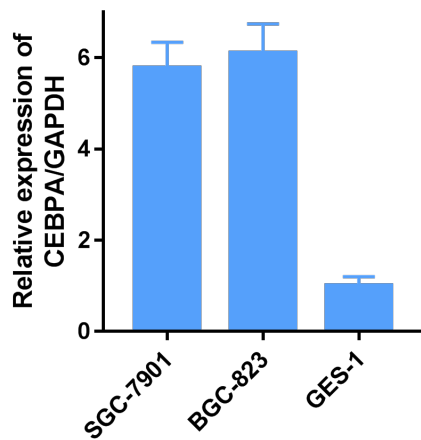

Supplement: Supplementary file 1 [file get_supplementary_file.php]
